# Supplementary material for: Synthesis and evaluation of a solid supported molecular tweezer type receptor for cholesterolElectronic supplementary information (ESI) available: synthetic procedures and analytical data for compounds 3–8. See http://www.rsc.org/suppdata/jm/b2/b210427j/
Source: Royal Society of Chemistry journal article supplement (doi:10.1039/b210427j), 2003-02-21
Supplement: b210427j.doc [file b210427j.doc]

SUPPLEMENTARY INFORMATION

Synthesis and Evaluation of a Solid Supported Molecular Tweezer Type Receptor for Cholesterol†

Louise Davidson,a Anton Blencowe,a Michael G.B. Drew,a Keith W. Freebairnb and Wayne Hayesa*

a TheSchool of Chemistry, The University of Reading, Whiteknights, Reading, Berkshire RG6 6AD UK.

E-mail: [w.c.hayes@reading.ac.uk](mailto:w.c.hayes@reading.ac.uk); Fax: +44 118 931 6331; Tel: ++44 118 931 6491

b Chemical Development, GlaxoSmithKline, Medicines Research Centre, Gunnels Wood Road, Stevenage, Hertfordshire SG1 2NY UK.

**3,5-Dibromobenzoic acid ethyl ester 3**

To a solution of 3,5-dibromobenzoic acid (8.10 g, 30 mmol) in diethyl ether (200 cm3) was added absolute ethanol (2 cm3), followed by DCC (6.60 g, 33 mmol) and DMAP (0.36 g, 3 mmol). The reaction was stirred at room temperature for 24 hours. The precipitated dicyclohexylurea by-product was filtered off under suction and washed with diethyl ether (10 cm3). The combined filtrate and washings were washed with water (3  60 cm3), 10% acetic acid (3  60 cm3) and water (30 cm3). The combined organic extracts were dried (MgSO4), filtered at the pump and evaporated to yield the required ester **3** (6.75g, 73%) as a cream solid; mp 58-59 C; max (film)/cm-1 480, 657, 762, 1270, 1414, 1474, 1558, 1727, 2929 and 3064; H (250 MHz; CDCl3; Me4Si) 1.05 (3H, t, *J* = 5 Hz, C*H*3), 4.27 (2H, q, *J* = 5 Hz, C*H*2,), 7.75 (1H, appt. t, *J* = 3 Hz, ArC*H*), 8.02 (2H, appt. d, *J* = 3Hz, ArC*H*); C (67.5 MHz; CDCl3; Me4Si)14.6 (*C*H3), 62.2 (*C*H2), 123.3 (2  Ar*C*H), 131.7 (2  Ar*C*-Br), 134.0 (Ar*C*H), 138.5 (Ar*C*-COOEt), 164.4 (*C*OOEt); m/z (CI) 308 (M+, 100%).

**3,5-Bis(3-hydroxyprop-1-ynl)benzoic acid ethyl ester 4**

To a solution of 3,5-dibromobenzoic acid ethyl ester (5 g, 16.3 mmol) in dry THF (50 cm3), was added bis(dibenzylideneacetone)palladium (0.375 g, 0.70 mmol), triphenylphosphine (0.850 g, 3.30 mmol), copper iodide (0.125 g, 0.70 mmol) and triethylamine (25 cm3). The reaction was stirred under argon at room temperature for 1 hour. Propargyl alcohol (2.07 g, 36.00 mmol) was added gradually over 45 minutes, and the reaction heated at reflux temperature for 24 hours under argon. The colloidal palladium salts were then filtered and washed with THF. The combined filtrate and washings were evaporated under reduced pressure. The resultant residue was dissolved in chloroform (50 cm3) and washed with dilute hydrochloric acid (20 cm3) followed by brine (2  20 cm3). The combined organic layers were dried over magnesium sulfate, filtered under vacuum and evaporated to yield a dark brown oil that was purified by column chromatography on silica (dichloromethane-EtOAc 6 : 4) to afford diol **4** (3.05 g, 72 %) as an off-white solid: mp 163-164 oC; max (film)/cm-1: 666, 723, 1414, 1462, 1585, 1735, 2354, 2856 and 2923; H (250 MHz; CDCl3; Me4Si) 1.17 (3H, t, *J* = 7 Hz, C*H*3,), 4.22 (2H, q, *J* = 7 Hz, C*H*2), 4.42 (4H, s, 2  C*H*2), 7.43 (1H, appt. t, *J* = 3 Hz, ArC*H*), 7.86 (2H, appt. d, *J* = 3 Hz, ArC*H*); C (67.5 MHz; CDCl3; Me4Si) 13.1 (*C*H3), 50.1 (2  *C*H2), 60.6 (*C*H2), 82.5 (2  *C*C), 88.0 (2  C*C*), 122.3 (2  Ar*C*H), 129.7 (Ar*C*H), 131.2 (2  Ar*C*-C), 137.2 (Ar*C*-COOEt), 164.4 (*C*=OOEt); *m/z* (TOF MS ES+, mobile phase 70:30 CH3CN: 0.05 M NH4OAc (aq), flow injection): calculated for C15H14O4 258.2732, found 792.3010 (3M + NH4)+, 534.2120 (2M + NH4)+, 517.1837 (2M + H)+, 481.1641 (2M + H – 2H2O), 300.1233 (MH + CH3CN)+, 259.0965 (MH)+.

**3,5-Bis(3-hydroxyprop-1-ynl)benzoic acid 5**

To a solution of 3,5-bis(3-hydroxyprop-1-ynl)benzoic acid ethyl ester (0.16 g, 0.61 mmol) in acetone (5 cm3) was added a 1M solution of lithium hydroxide (0.21 g, 5.00 mmol) in water (5 cm3). The reaction was held under reflux for a period of 2 hours. The solvent was evaporated under reduced pressure, and the aqueous residue acidified with 1M hydrochloric acid until pH 2. A white precipitate formed, that was filtered off under suction and washed with water. The precipitate was dissolved in toluene (50 cm3), and the solvent evaporated under reduced pressure to yield acid 5 (0.092g, 70%) as an off- white solid: mp 120-121 oC; max (film)/cm-1 670, 723, 971, 1309, 1591, 1710, 2295, 2725, 3172, and 3421; H (250 MHz; d6‑DMSO; Me4Si) 4.31 (4H, s, 2  C*H*2), 5.40 (2H, s, 2  O*H*), 7.63 (1H, appt. t, *J* = 3 Hz, ArC*H*), 7.86 (2H, appt. d, *J* = 3 Hz ArC*H*); C (67.5 MHz; d6-DMSO; Me4Si) 48.9 (2  *C*H2), 81.3 (2  *C*C), 91.2 (2  C*C*), 123.1 (2  Ar*C*H), 131.1 (Ar*C*H), 131.6 (Ar*C*-CC), 136.5 (Ar*C*-COOH), 165.3 (*C*=OOEt); *m/z* (TOF MS ES+, mobile phase 70:30 CH3CN: 0.05 M NH4OAc (aq), flow injection): calculated for C13H10O4 229.0501, found 229.0520 (M – H)+.

3,5-Bis-[3-(*tert*-butyl- dimethyl-silanyloxy)-prop-1-ynyl]-benzoic acid 6

To a solution of 3,5-bis(3-hydroxyprop-1-ynl)benzoic acid 5 (1.11 g, 4.84 mmol) in dry DMF (5 cm3) was added a solution of tert-butyldimethylsilyl (TBDMS) chloride (2.18 g, 14.50 mmol) in dry DMF (5 cm3). Imidazole (1.08g, 17.00 mmol) was added and the reaction stirred at room temperature for 24 hours under nitrogen. Water (10 cm3) was then added and the aqueous phase extracted with chloroform (3  30 cm3). The combined organic layers were washed with saturated ammonium chloride solution (20 cm3), dried over magnesium sulfate, filtered and evaporated to afford the crude product that was purified by column chromatography on silica (dichloromethane: EtOAc 8: 2), affording the TBDMS protected acid 6 (0.89 g, 40%) as a transparent oil; max (film)/cm-1 670, 722, 865, 1094, 1256, 1462, 1583, 1700, 2354, 2856 and 3200; H (250 MHz; d6-DMSO; Me4Si) 0.10 (12 H, s, 2  Si(C*H*3)2), 0.75 (18H, s, 2  C(C*H*3)3), 4.45 (4H, s, 2  C*H*2), 7.50 (1H, t, appt. *J* = 2 Hz, ArC*H*,), 7.75 (2H, appt. d, *J* = 2 Hz, ArC*H*,); C (67.5 MHz; d6-DMSO; Me4Si) –6.5 (2  Si(*C*H3)2), 17.2 (2  *C*(CH3)3), 24.5 (2  (*C*H3)3), 50.9 (2  *C*H2), 81.4 (2  *C*C), 88.7 (2  C*C*), 121.0 (2  Ar*C*H), 123.8 (Ar*C*H), 131.0 (2  Ar*C*-CC), 136.5 (Ar*C*-COOH), 165.4 (*C*=OOEt); *m/z* (TOF MS ES+, mobile phase 70:30 CH3CN: 0.05 M NH4OAc (aq), flow injection): calculated for C25H38O4Si2 458.16, found 457.2231 (M – H)+.

3,5-Bis-[3-(*tert*-butyl- dimethyl-silanyloxy)-prop-1-ynyl]-*N*-(4-vinyl-phenyl)-benzamide 7

To a solution of the TBDMS protected 3,5-bis(3-hydroxy-1-propynl)benzoic acid **6** (0.26 g, 0.56 mmol) in dry DMF (5 cm3) cooled to 0 oC, was added EDCI (0.14 g, 0.73 mmol), and 1-hydroxybenzotriazole hydrate (0.11 g, 0.80 mmol). After 5 minutes, 4-vinylaniline (0.11 g, 0.91 mmol) was added, and the reaction stirred at room temperature under nitrogen for 4 hours. A solution of 10% isopropanol in chloroform (100 cm3) was added, and the mixture washed with water (5  50 cm3). The two phases were separated and the organic extract dried over sodium sulfate, filtered and the solvent evaporated. The resultant crude residue was purified by column chromatography on silica (dichloromethane: EtOAc 8: 2) to afford the amine **7** (0.23 g, 72%) as a viscous oil; max (film)/cm-1: 778, 837, 1089, 1592, 1645, 1647, 2150, 2800 and 3645; H (250 MHz; CDCl3; Me4Si) 0.10 (12H, s, 2  Si(C*H*3)2), 1.77 (18H, s, 2  C(C*H*3)3), 4.33 (4H, s, 2  C*H*2), 5.01 (1H, dd, *J* = 18 Hz, 6 Hz, CH=C*H*2), 5.55 (1H, dd, *J* = 18 Hz, 6 Hz, CH=C*H*2), 6.40 (1H, t, *J* = 6 Hz, C*H*=CH2), 7.15 (2H, AA’XX’, Ar*H*), 7.40 (2H, AA’XX’, Ar*H*), 7.80 (1H, appt. t, *J* = 2.5 Hz, Ar*H*), 7.95 (2H, appt. d, *J* = 2.5 Hz, ArC*H*), 8.00 (1H, s, N*H*); C (67.5 MHz; CDCl3; Me4Si) 17.3 (2  C(*C*H3)3), 24.4 (2  *C*(CH3)3), 51.1 (2  *C*H2), 81.9 (2  *C*C), 88.8 (2  C*C*), 112.2 (CH=*C*H2), 123.0 (2  Ar*C*H), 125.9 (2  Ar*C*H), 126.3 (Ar*C*H), 128.7 (2  Ar*C*H), 133.3 (2  Ar*C*-CC), 134.4 (Ar*C*-C=O), 135.0 (Ar*C*N), 136.12 (Ar*C*-CH=CH2), 136.2 (*C*H=CH2), 163.2 (*C*=O); *m/z* (TOF MS ES+): calculated for C33H45O3NSi2 559.8957, found 560.3026 (M+H)+.

**3,5-Bis(3-hydroxy-1-propynl)-*N*-(4-vinylphenyl)benzamide 8**

To a solution of TBDMS-protected 3,5-bis(3-hydroxy-1-propynl)-*N*-(4-vinylphenyl)benzamide **7** (0.066 g, 0.12 mmol) in dry THF (1 cm3) was added a mixture of TBAF (1M solution in THF; 0.14 cm3, 0.5 mmol) and acetic acid (30 L, 0.50 mmol). The reaction was stirred at room temperature for one hour. Water (1 cm3) was added to the residue and the product was extracted with ether (3  10 cm3). The combined organic layers were dried over sodium sulfate, filtered and the solvent evaporated affording a crude product that was purified by column chromatography on silica (dichloromethane: EtOAc 9: 1), to yield the deprotected amide **8** (0.031 g, 77%) as a yellow solid; mp 214-215 oC; max (film)/cm-1: 840, 1589, 1640, 1647, 2149, 2900, 3583 and 3691; H (250 MHz; CDCl3; Me4Si) 2.6 (4H, s, 2  C*H*2), 3.35 (1H, dd, *J* = 18 Hz, 5 Hz, CH=C*H*2), 3.95 (1H, dd, *J* = 18 Hz, 5 Hz, CH=C*H*2), 4.90 (1H, t, *J* = 5 Hz, C*H*=CH2), 5.65 (2H, AA’XX’, 2  ArC*H*,), 5.85 (1H, appt. t, ArC*H*), 6.05 (2H, AA’XX’, 2  ArC*H*), 6.20 (2H, appt. d, 2  ArC*H*), 7.95 (1H, s, N*H*); C (67.5 MHz; CDCl3; Me4Si) 48.5 (2  *C*H2), 73.30 (2  *C*C), 82.40 (2  C*C*), 110.02 (CH=*C*H2), 124.15 (Ar*C*-CC), 124.21 (Ar*C*-CC), 124.85 (2  Ar*C*H), 126.72 (2  Ar*C*H), 127.85 (2  Ar*C*H), 128.48 (Ar*C*H), 130.35 (Ar*C*-N), 134.60 (Ar*C*-C=O), 136.01 ( Ar*C*-CH=CH2), 136.20 (*C*H=CH2), 163.46 (*C*=O); *m/z* (TOF MS ES+): calculated for C21H17O3N 331.3705, found 663.2470 (2M + H+), 332.1214 (M + H+).
